# Supplementary material for: Low‐Power Memristive Logic Device Enabled by Controllable Oxidation of 2D HfSe2 for In‐Memory Computing
Source: PubMed Central journal article supplement (PMC8336485; doi:10.1002/advs.202005038), 2021-05-29
Supplement: ADVS-8-2005038-s001.pdf [file ADVS-8-2005038-s001.pdf]

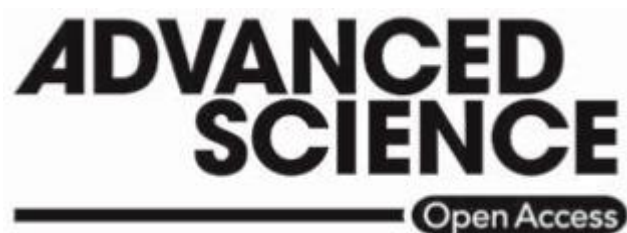

## Supporting Information

for *Adv. Sci.*, DOI: 10.1002/advs.202005038

### Low-power Memristive Logic Device Enabled by Controllable Oxidation of Two-dimensional HfSe<sub>2</sub> for in-memory Computing

*Long Liu,<sup>#</sup> Yi Li,<sup>#</sup> Xiaodi Huang, Jia Chen, Zhe Yang, Kan-Hao Xue, Ming Xu,\*  
Huawei Chen, Peng Zhou,\* and Xiangshui Miao\**

## Supporting Information

### **Low-power memristive logic device enabled by controllable oxidation of two-dimensional HfSe<sub>2</sub> for in-memory computing**

*Long Liu,<sup>#</sup> Yi Li,<sup>#</sup> Xiaodi Huang, Jia Chen, Zhe Yang, Kan-Hao Xue, Ming Xu,\*  
Huawei Chen, Peng Zhou,\* and Xiangshui Miao\**

Long Liu, Prof. Yi Li, Xiaodi Huang, Jia Chen, Dr. Zhe Yang, Prof. Kan-Hao Xue,  
Prof. Ming Xu, Prof. Xiangshui Miao

*Wuhan National Laboratory for Optoelectronics, School of Optical and Electronic  
Information, Huazhong University of Science and Technology, Wuhan 430074, China*

*Email: [mxu@hust.edu.cn](mailto:mxu@hust.edu.cn), [miaoxs@hust.edu.cn](mailto:miaoxs@hust.edu.cn)*

Huawei Chen, Prof. Peng Zhou

*State Key Laboratory of ASIC and System, School of Microelectronics, Fudan  
University, Shanghai 200433, China*

*Email: [pengzhou@fudan.edu.cn](mailto:pengzhou@fudan.edu.cn),*

<sup>#</sup>Authors contribute equally to this work

<sup>\*</sup>E-mail: [mxu@hust.edu.cn](mailto:mxu@hust.edu.cn), [pengzhou@fudan.edu.cn](mailto:pengzhou@fudan.edu.cn), [miaoxs@hust.edu.cn](mailto:miaoxs@hust.edu.cn)

Keywords: 2D materials, HfSe<sub>2</sub>, oxidation, memristor, low power consumption,  
nonvolatile resistive switching, in-memory computing

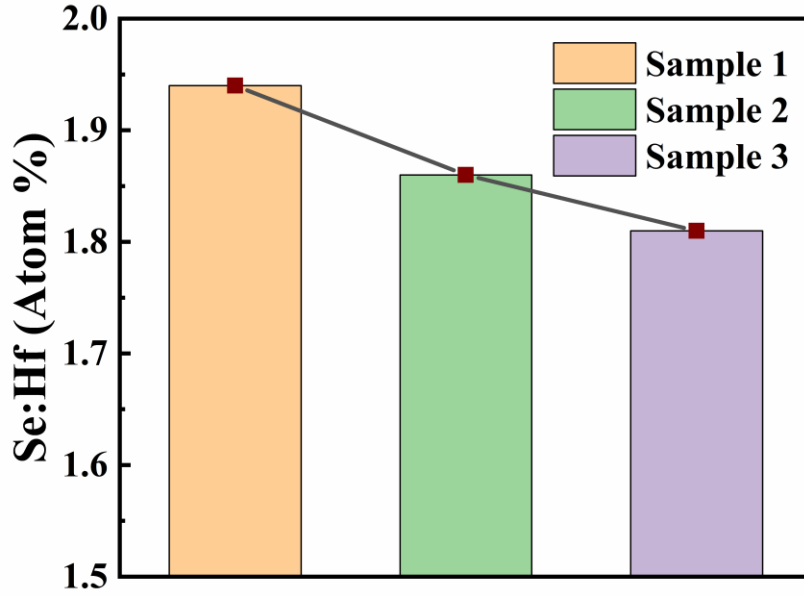

**Figure S1.** With the increase of oxidation power, the Se:Hf ratio gradually decreases. Sample 1 (air exposure), Sample 2 (60 W, 5 min), Sample 3 (140 W, 5 min)

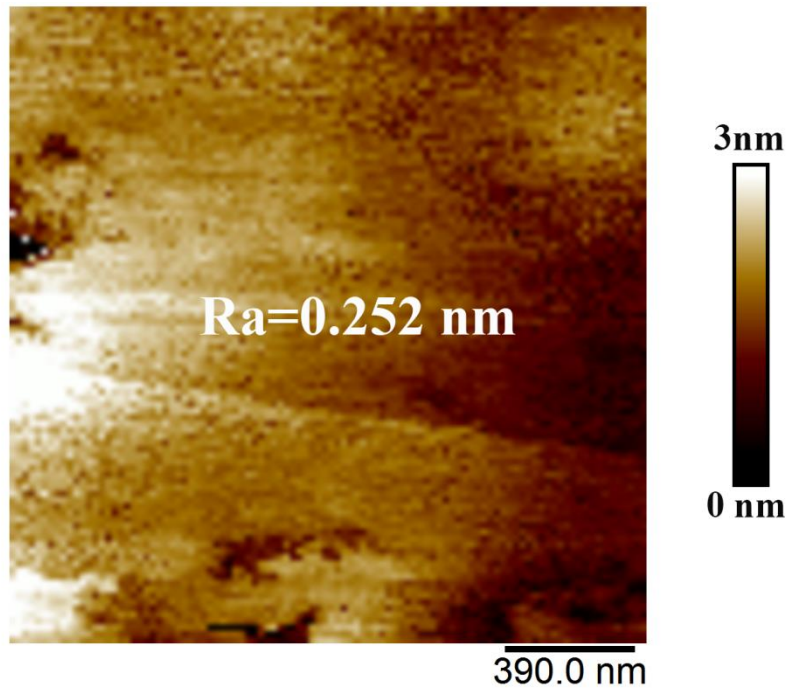

**Figure S2.** After O<sub>2</sub>-plasma treatment (60 W, 5 min), the oxide surface remains smooth, with an average roughness (Ra) of only 2.52 Å, measured by atomic force microscopy. The scanning area is 3×3 μm<sup>2</sup>.

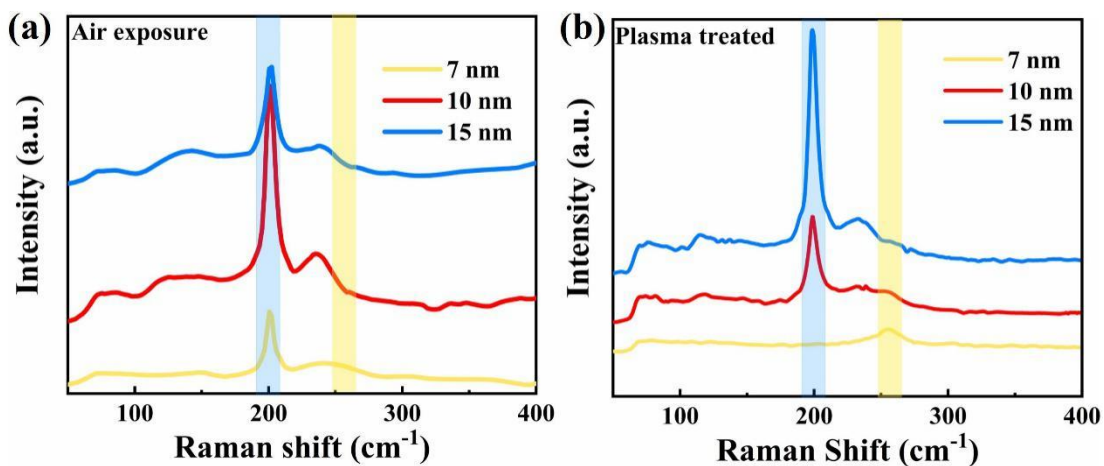

**Figure S3.** Raman spectra of air-exposed and  $O_2$ -plasma treated of  $HfSe_2$  with different thicknesses. Oxidation by  $O_2$ -plasma treatment is more thorough than by spontaneous air exposure. The thinner of the starting 2D  $HfSe_2$  layer, the easier it is to be oxidized, and 2D  $HfSe_2$  films below 10 nm have been completely oxidized.

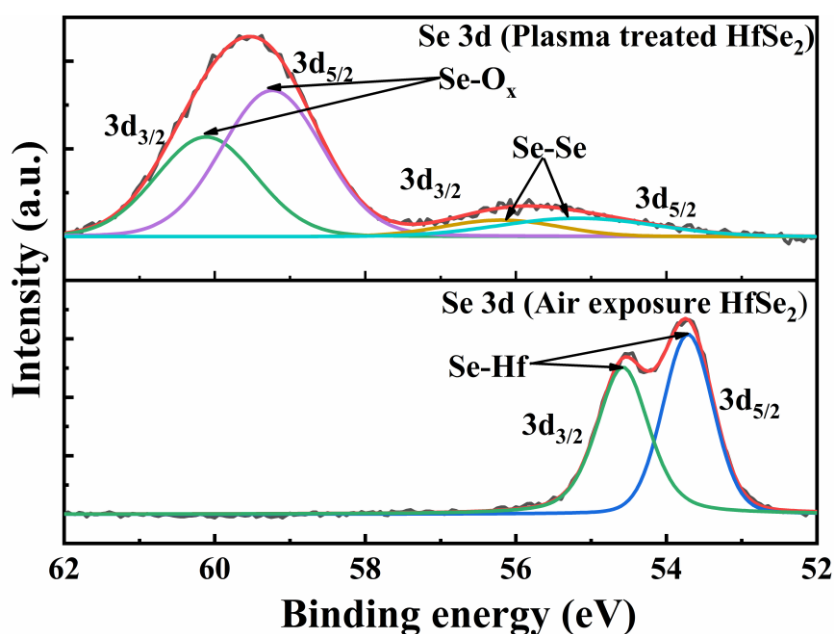

**Figure S4.** XPS spectra of Se 3d core level for air exposure and oxygen-plasma treated  $HfSe_2$  flakes. The two different chemical states of  $O_2$  plasma treated  $HfSe_2$  indicate the formation of the residual materials including  $SeO_x$  and Se.

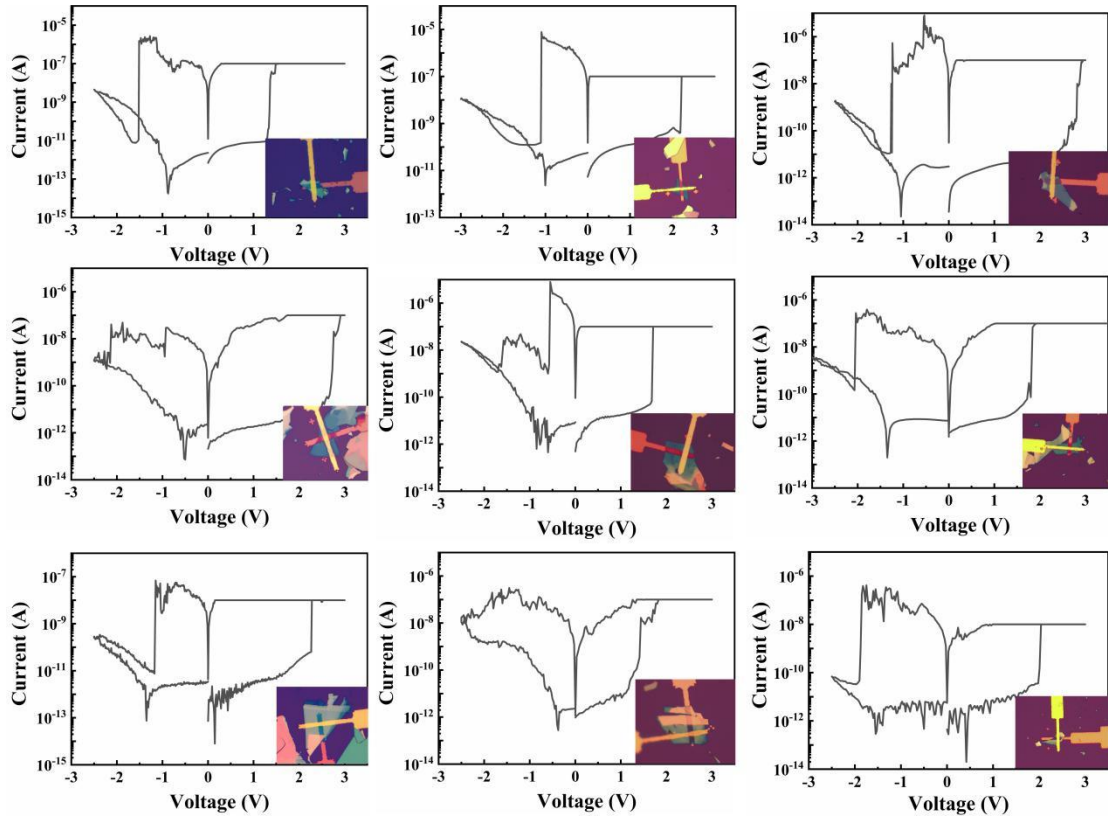

**Figure S5.** I-V curves of multiple devices. All devices can switch at 100 nA operation current or less within 3V.

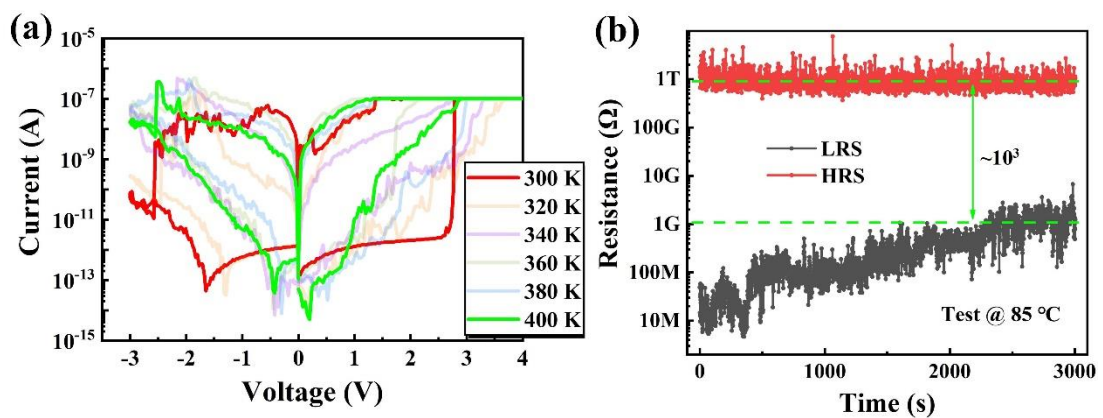

**Figure S6.** Thermal stability of the devices. a) I-V curves of a typical device at elevated temperature up to 400 K, showing functional switching behavior. b) The data retention of both HRS and LRS at 85 °C.

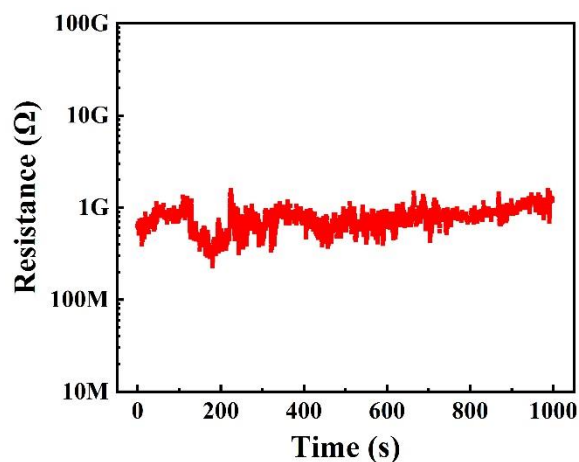

**Figure S7.** Retention characteristics of the LRS under 100 pA operation current at room temperature using the read voltage of 10 mV.

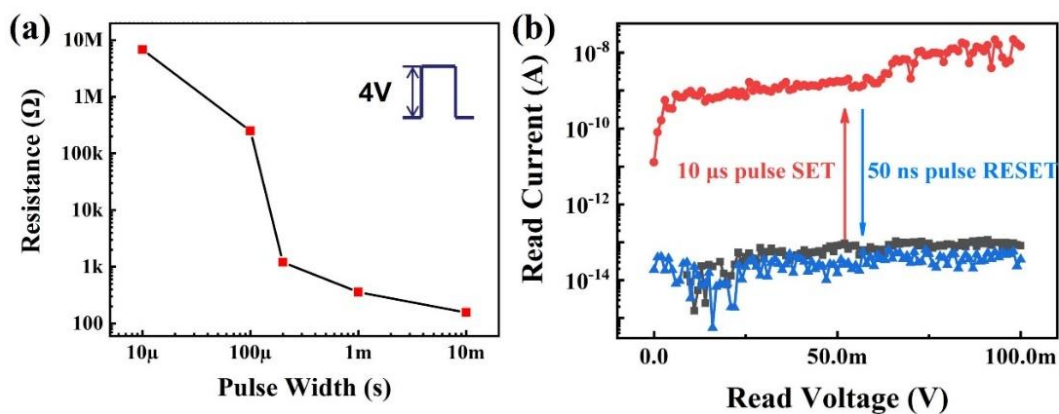

**Figure S8.** a) The LRS decreases with the increase in the SET pulse width, when the SET pulse amplitude is fixed at 4 V. The SET speed of the device can be less than 10  $\mu$ s. b) Read operation after applying 4 V/10  $\mu$ s SET and -4 V/50 ns RESET operation pulses. Both HRS and LRS are read at 0.1 V.

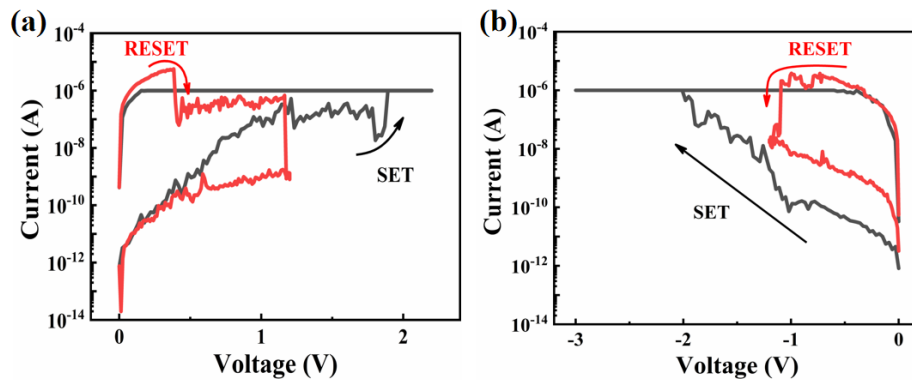

**Figure S9.** Unipolar RS behavior of the Au/HfSe<sub>x</sub>O<sub>y</sub>/HfSe<sub>2</sub>/Au device in both positive and negative sweeps. This device with symmetric metal electrodes shows unreliable switching behaviors with large variation and limited endurance.

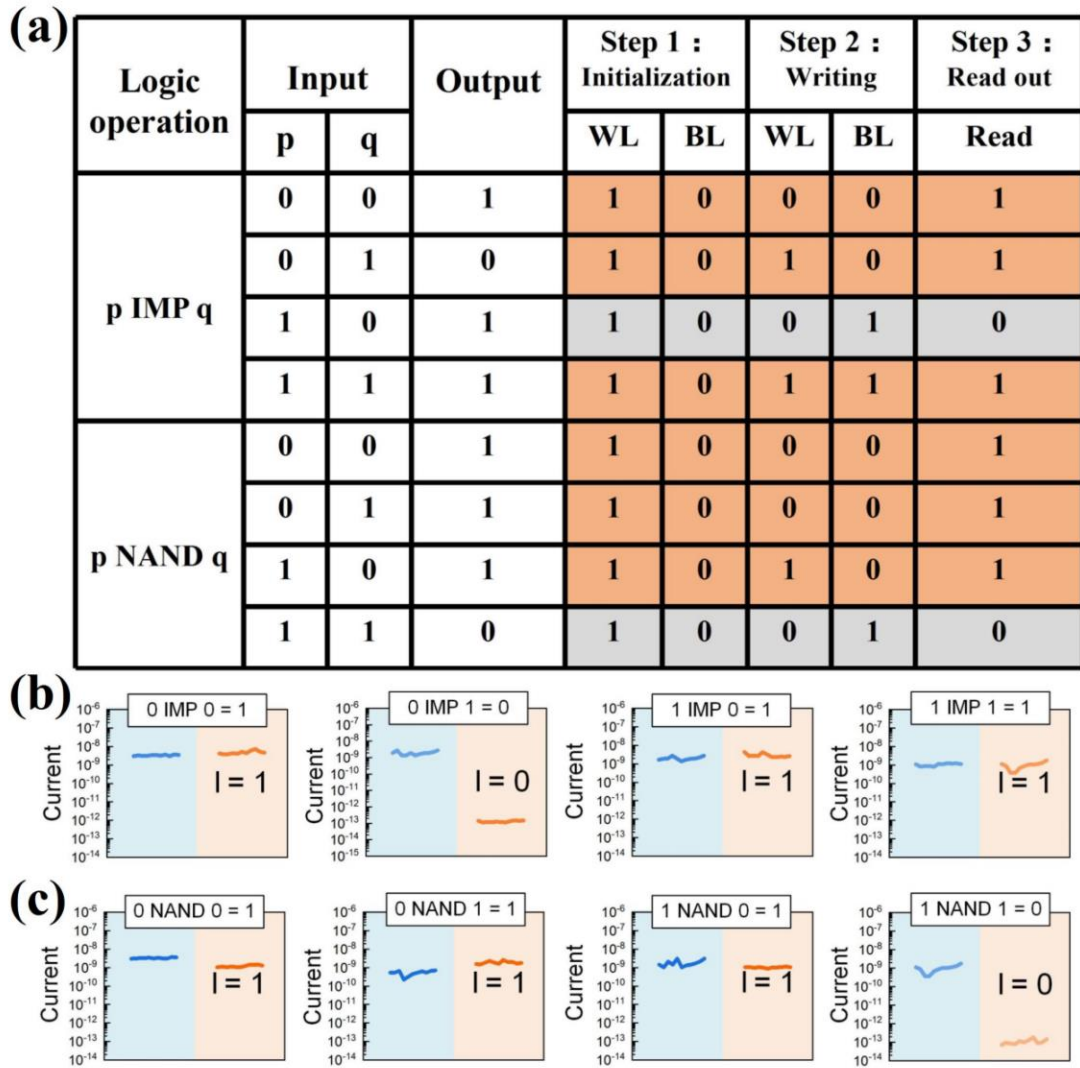

**Figure S10.** a) IMP and NAND logic functions and corresponding operation steps are shown in the truth table. For IMP and NAND logic functions, four variables are assigned ( $W=1, A=p, B=q$  and  $C=0$ ) and ( $W=1, A=0, B=p$  and  $C=q$ ) respectively. c) Experimental results of IMP and NAND logic operations, demonstrating the feasibility of our logic method and the functional device.
